# Supplementary material for: A stability-reversibility map unifies elasticity, plasticity, yielding, and jamming in hard sphere glasses
Source: PubMed Central journal article supplement — Sci Adv. 2018 Dec 7;4(12):eaat6387. doi: 10.1126/sciadv.aat6387 (PMC6286169; doi:10.1126/sciadv.aat6387), 2018-12-07
Supplement: aat6387_SM.pdf [file aat6387_SM.pdf]

## Supplementary Materials for

### **A stability-reversibility map unifies elasticity, plasticity, yielding, and jamming in hard sphere glasses**

Yuliang Jin\*, Pierfrancesco Urbani, Francesco Zamponi, Hajime Yoshino\*

\*Corresponding author. Email: yuliangjin@itp.ac.cn (Y.J.); yoshino@cmc.osaka-u.ac.jp (H.Y.)

Published 7 December 2018, *Sci. Adv.* **4**, eaat6387 (2018)

DOI: 10.1126/sciadv.aat6387

#### **This PDF file includes:**

- Fig. S1. Single-realization stress-strain curve for  $\varphi_g = 0.655$  and  $\epsilon = 0.057$ .
- Fig. S2. Multicycle stress-strain curves.
- Fig. S3. Other representations of the stability-reversibility map.
- Fig. S4. Rescaled stress-strain curves.
- Fig. S5. Determination of the Gardner threshold for other  $\varphi_g$ .
- Fig. S6. Determination of the yielding-jamming crossover point.
- Fig. S7. Free-volume scalings in shear jamming.
- Fig. S8. Pressure susceptibility in the CS-C/D protocol.
- Fig. S9. Dependence of the stability-reversibility map on  $\varphi_g$  and protocols.
- Fig. S10. Dependence of the stability-reversibility map on the system size.
- Text S1. Bare and macro shear moduli.

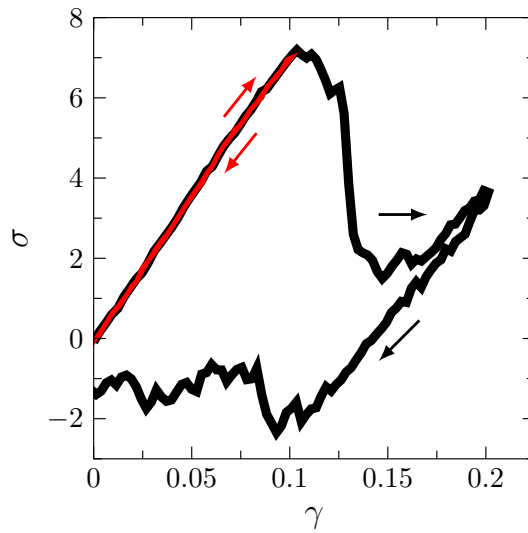

**Fig. S1. Single-realization stress-strain curve for  $\varphi_g = 0.655$  and  $\epsilon = 0.057$ .** Single-realization stress-strain curve of the same glass sample as in Fig. 1 at the fixed volume strain  $\epsilon = 0.057$  (or  $\varphi = 0.62$ ). The shear strain is reversed at  $\gamma = 0.1$  (red) and  $\gamma = 0.2$  (black). In contrast to the case in Fig. 1A, the partially irreversible regime is not observed. Note that according to the stability-reversibility map of Fig. 2, the Gardner line will not be crossed over in the CV-S protocol with the volume strain  $\epsilon = 0.057$ .

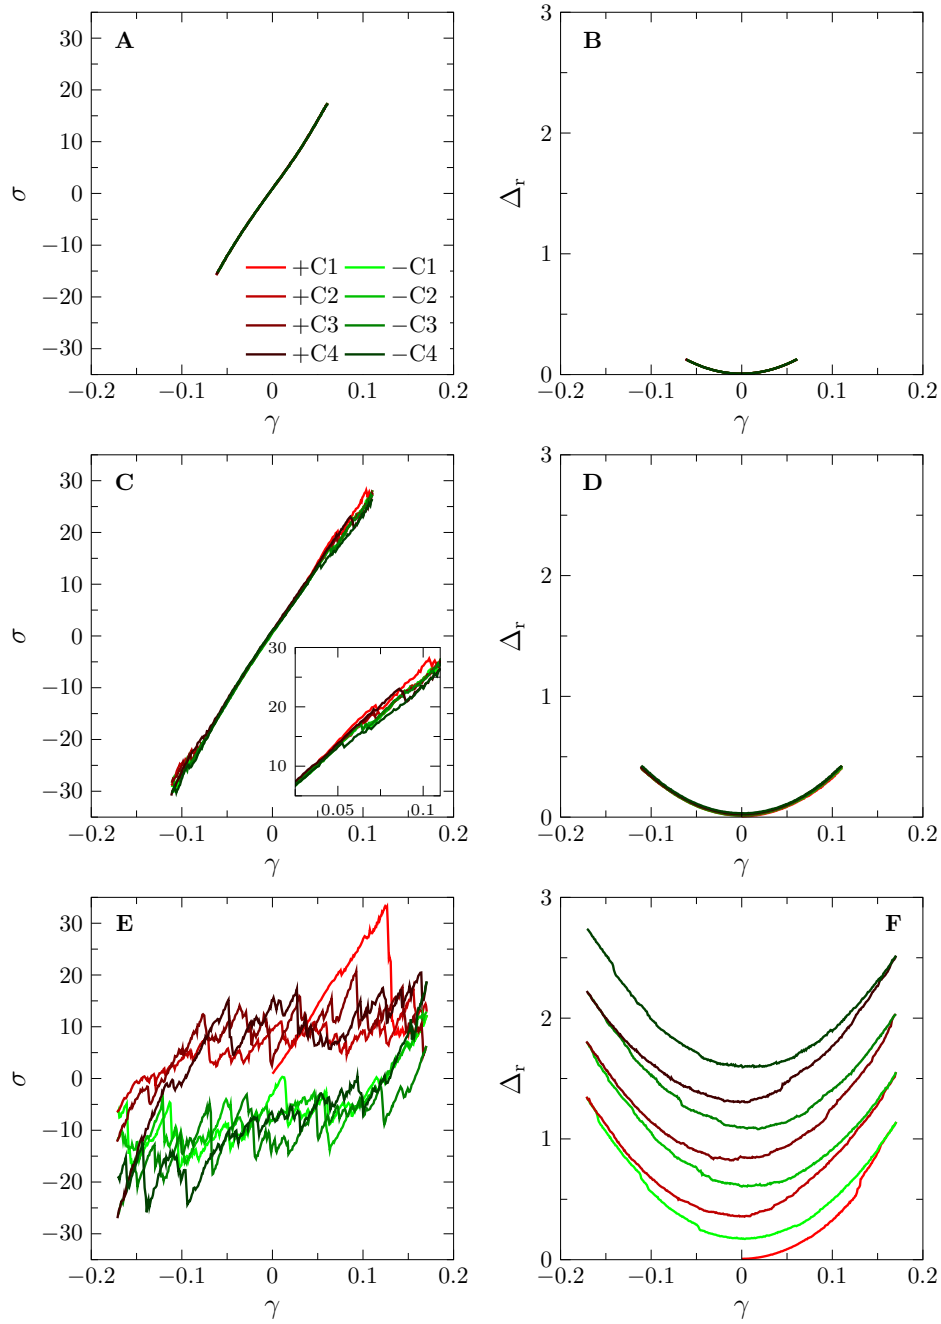

**Fig. S2. Multicycle stress-strain curves.** Single-realization stress-strain curves of a single sample over four cycles of constant volume shear at  $\epsilon = -0.0069$ , or  $\varphi = 0.66$  (compressed from  $\varphi_g = 0.655$ ). The shear strain is reversed at **(A)**  $\gamma = \pm 0.06$ , **(C)**  $\gamma = \pm 0.11$ , and **(E)**  $\gamma = \pm 0.17$ . The cycle numbers (1, 2, 3, 4) and the shear directions (+ or -) are indicated. In **(C)**, the data for  $0.02 \leq \gamma \leq 0.11$  are magnified in the inset to show better the plastic events. The corresponding data of the relative mean squared displacement  $\Delta_r$  are shown in **(B)**, **(D)** and **(F)**. While in **(B)** and **(D)** the system returns to the initial state, in **(F)** a diffusive behavior of  $\Delta_r$ , which increases steadily at each cycle, is observed.

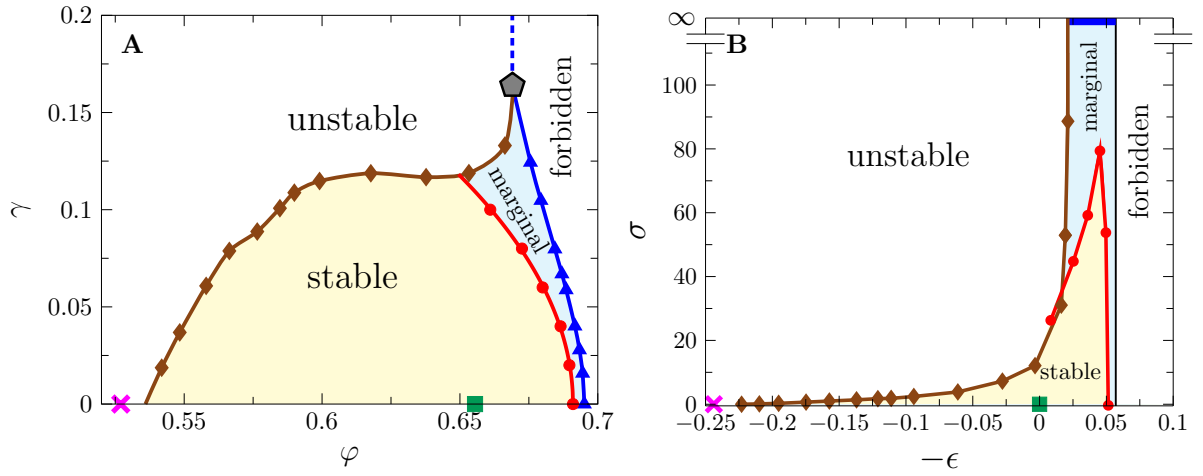

**Fig. S3. Other representations of the stability-reversibility map.** Stability-reversibility map of the HS glass annealed up to  $\varphi_g = 0.655$ , as in Fig. 2, but represented in terms of (A) volume fraction  $\varphi$  and shear strain  $\gamma$ , and (B) volume strain  $\epsilon$  and shear stress  $\sigma$ . See Fig. 2 for the meaning of symbols.

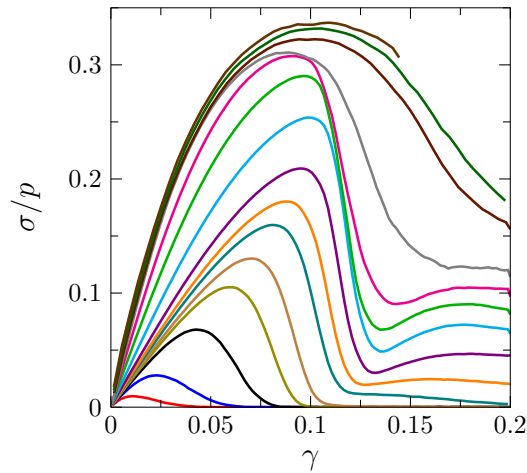

**Fig. S4. Rescaled stress-strain curves.** The ratio  $\sigma/p$  is plotted as a function of  $\gamma$  in the CP-S protocol, for  $p = 14.5, 15.0, 15.8, 16.5, 17, 18, 19, 21, 27, 40, 65, 160, 1000, 3000, 10000$  (from bottom to top), and  $\varphi_g = 0.655$ .

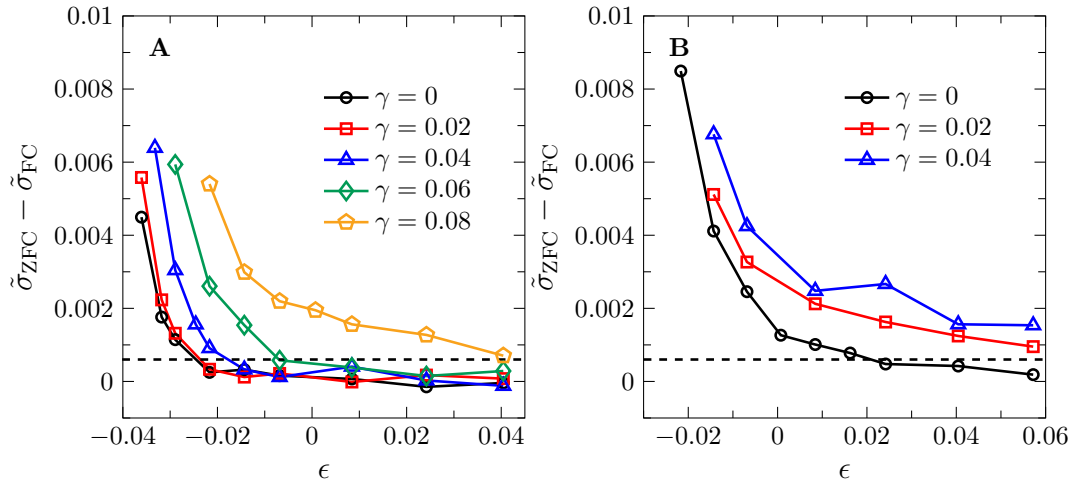

**Fig. S5. Determination of the Gardner threshold for other  $\varphi_g$**  The difference between ZFC and FC stresses (rescaled by  $p$ ,  $\tilde{\sigma} = \sigma/p$ ) as a function of volume strain  $\epsilon$  for **(A)**  $\varphi_g = 0.631$  and **(B)**  $\varphi_g = 0.609$ . Data for a few different  $\gamma$  are plotted. The horizontal dashed lines represent the threshold value 0.0006 used to determine  $\epsilon_G$ .

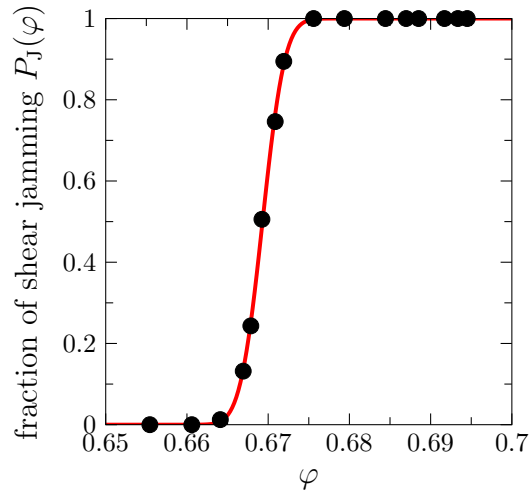

**Fig. S6. Determination of the yielding-jamming crossover point.** Fraction of shear jamming  $P_J(\varphi)$  as a function of  $\varphi$ . We use the following criteria to define shear jamming and yielding: a system jams with increasing  $\gamma$  if its pressure  $p$  exceeds  $10^5$ ; otherwise, if the system can reach the maximum strain  $\gamma_{\max} = 0.2$  without jamming, then it yields. We use  $P_J(\varphi)$  to denote the fraction of shear jammed realizations among  $N_r = 300 - 1200$  total realizations. The data are fitted to the error function form  $P_J(\varphi) = \frac{1}{2} + \frac{1}{2}\text{erf}[(\varphi - \varphi_c)/w]$  (line), where  $\varphi_c = 0.66931(3)$  and  $w = 0.0031(1)$  are fitting parameters.

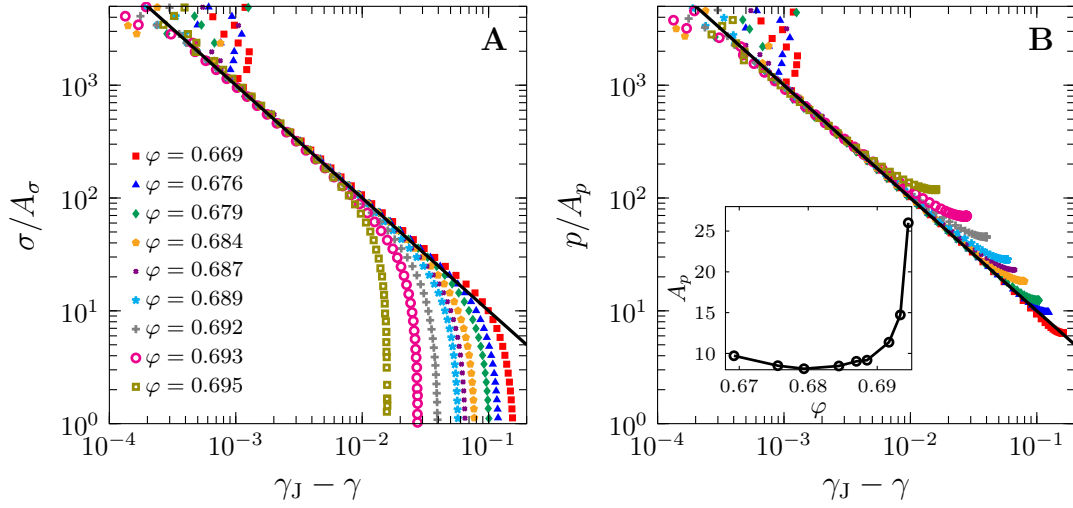

**Fig. S7. Free-volume scalings in shear-jamming.** The simulation data for different  $\varphi$  obtained by the CV-S protocol ( $\varphi_g = 0.655$ ) are fitted to the free-volume scaling laws **(A)**  $\sigma = A_\sigma(\gamma_J - \gamma)^{-1}$  and **(B)**  $p = A_p(\gamma_J - \gamma)^{-1}$ , where  $A_\sigma$ ,  $A_p$ , and  $\gamma_J$  are fitting parameters. The values of  $\gamma_J$  are used to determine the shear-jamming line in the main text. We find that  $A_\sigma \simeq 2.6$  is nearly independent of  $\varphi$ . The values of  $A_p$  are plotted in the inset of **(B)**.

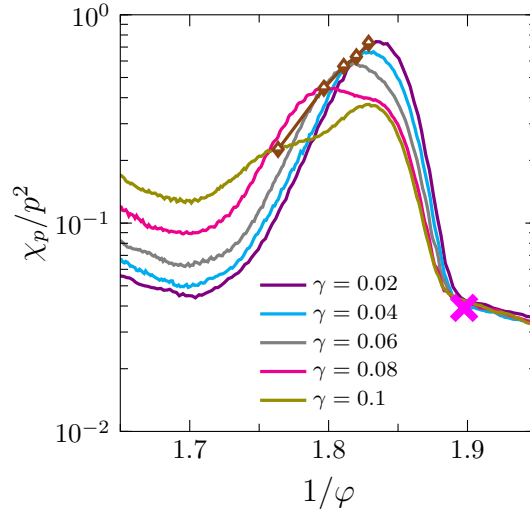

**Fig. S8. Pressure susceptibility in the CS-C/D) protocol.**

The pressure susceptibility  $\chi_p = N(\langle p^2 \rangle - \langle p \rangle^2)$  (rescaled by  $p^2$ ) as a function of  $1/\varphi$  for a few different  $\gamma$  in the CS-C/D) protocol. In contrast to  $\chi_\sigma$  (Fig. 5I), the pressure susceptibility  $\chi_p$  has two peaks at large  $\gamma$ . The first peak, caused by melting, is independent of  $\gamma$ , while the second one, corresponding to yielding, is at a location consistent with the peak of  $\chi_\sigma$  (half filled brown diamonds). The  $\gamma$ -independence of the melting peak in  $\chi_p$  further confirms that melting is independent of shear strain. For small  $\gamma$ , the two peaks are indistinguishable. The data suggest that the signature of melting only appears in the pressure susceptibility, but not in the stress susceptibility.

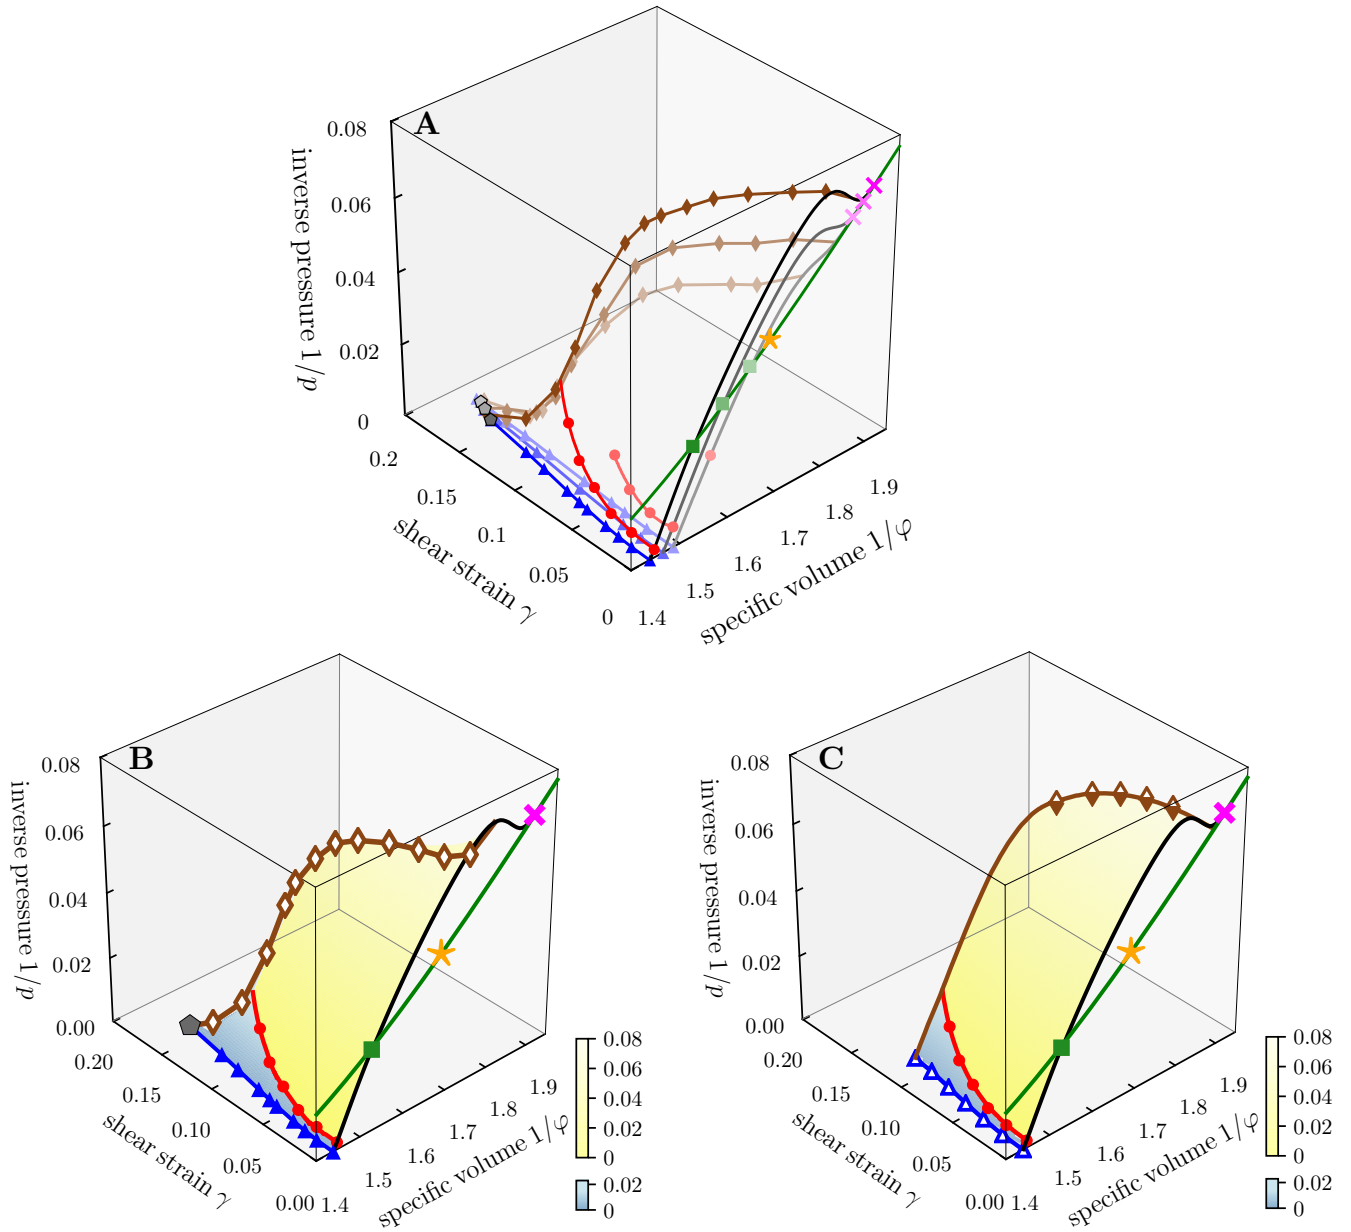

**Fig. S9. Dependence of the stability-reversibility map on  $\varphi_g$  and protocols.** (A) Three dimensional view of the stability-reversibility maps for  $\varphi_g = 0.609, 0.631, 0.655$  (lighter colors represent lower  $\varphi_g$ ) obtained by using the CP-S protocol. (B-C) The same plot for  $\varphi_g = 0.655$ , obtained by using the (B) CV-S and (C) CS-C/D protocols. See Fig. 2 for the meaning of the symbols.

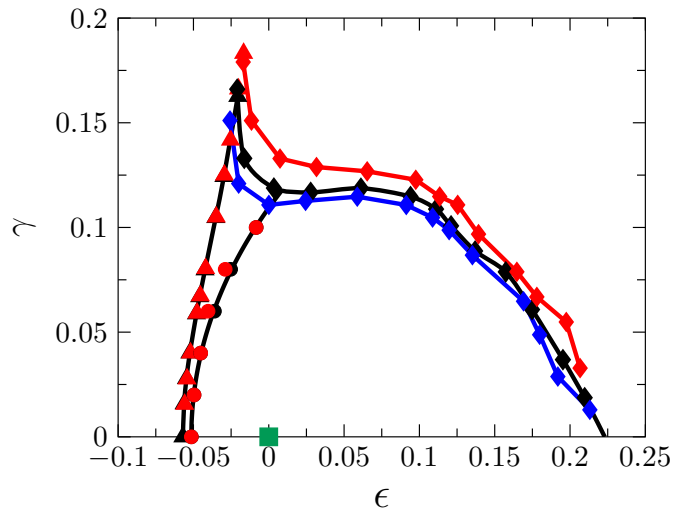

**Fig. S10. Dependence of the stability-reversibility map on the system size.** Stability-reversibility maps for  $N = 500$  (red) and  $N = 1000$  (black) systems ( $\varphi_g = 0.655$ ). No appreciable  $N$ -dependence is observed for the shear-jamming line and the Gardner line. We also plot the shear-yielding line for  $N = 2000$  systems (blue), showing that larger systems have lower yielding strain  $\gamma_Y$ . See Fig. 2 for the meaning of the symbols.



**Text S1. Bare and macro shear moduli.**

As discussed in the main text, two shear moduli can be defined for glasses: the bare modulus

$$\mu_{\text{bare}} = \lim_{N \rightarrow \infty} \lim_{\delta\gamma \rightarrow 0} \delta\sigma(\varphi_g; \epsilon, \gamma; N)/\delta\gamma, \quad (\text{S1})$$

and the macroscopic modulus

$$\mu_{\text{macro}} = \lim_{\delta\gamma \rightarrow 0} \lim_{N \rightarrow \infty} \delta\sigma(\varphi_g; \epsilon, \gamma; N)/\delta\gamma. \quad (\text{S2})$$

According to the mean-field theory [37] in stable glasses  $\mu_{\text{bare}} = \mu_{\text{macro}}$ , while in marginal glasses  $\mu_{\text{bare}} > \mu_{\text{macro}}$ . In particular, the two shear moduli have different large- $p$  scalings in the marginal phase,  $\mu_{\text{macro}} \sim p$  and  $\mu_{\text{bare}} \sim p^\kappa$ , where  $\kappa \sim 1.41574$ .

In principle, we expect that the zero-field compression (ZFC) modulus  $\mu_{\text{ZFC}}$  and the field compression (FC) modulus  $\mu_{\text{FC}}$  measured in simulations have the correspondence  $\mu_{\text{ZFC}} \sim \mu_{\text{bare}}$  and  $\mu_{\text{ZFC}} \sim \mu_{\text{macro}}$ . Ref. [24] shows that the simulation results of three dimensional HS glasses are generally consistent with the above theoretical predictions. In the marginal phase,  $\mu_{\text{ZFC}}$  and  $\mu_{\text{FC}}$  clearly have different scalings with  $p$ . It was also found that, at large  $p$ ,  $\mu_{\text{ZFC}}$  decreases with increasing  $N$  or  $\delta\gamma$  (note that in simulations, the modulus is measured as  $\mu = \delta\sigma/\delta\gamma$ , where small, but finite  $\delta\gamma$  is used). This shows that the order of limits  $N \rightarrow \infty$  and  $\delta\gamma \rightarrow 0$  is important in the definition of shear modulus. If we fix a finite  $N$ , then by increasing  $\delta\gamma$ ,  $\mu_{\text{ZFC}} \rightarrow \mu_{\text{FC}} = \mu_{\text{macro}}$ . In fact, one should only be able to detect the  $\mu_{\text{ZFC}}$  if  $\delta\gamma < \delta\gamma_{\text{trigger}}$  as discussed in the main text. In this study, we use a small enough  $\delta\gamma = 0.002$ , as shown in [24], to measure  $\mu_{\text{ZFC}}$  and  $\mu_{\text{FC}}$ .

In the measurements of the glass equation of state (G-EOS), either the constant volume-shear (CV-S) or the constant pressure-shear (CP-S) protocol corresponds to ZFC. However, we find that the curves  $\sigma/p$  versus  $\gamma$  collapse for large  $p$  (see Fig. S4), implying a scaling  $\sigma \sim p$ , as  $p \rightarrow \infty$ , similar to  $\mu_{\text{macro}} \sim p$ . The result confirms that for large  $\gamma$ , the plasticity events are averaged out in the stress, and therefore only the macroscopic stress  $\sigma_{\text{macro}}$  can be measured. This is the reason why the G-EOS itself does not encode the signal associated to the Gardner phase.
